# Supplementary material
Source: Springer Nature journal article supplement (https://www.springermedizin.de/resource/supplementary/12985_2008_420_MOESM3_ESM.pdf/9608042)
Supplement: MOESM3 [file 9608042]

**Selection results for logistic regression models used to describe temporal and species variation in rRT-PCR prevalence among age and sex classifications.**

| Model Structure <sup>a</sup>                   | # parameters <sup>b</sup> | AIC <sup>c</sup> | $\Delta$ AIC <sup>d</sup> | AIC weight <sup>e</sup> |
|------------------------------------------------|---------------------------|------------------|---------------------------|-------------------------|
| Sex, age, sex*age, date, species               | 7                         | 1054.1           | 0.0                       | 0.696                   |
| Sex, age, sex*age, date, species, species*date | 9                         | 1055.8           | 1.7                       | 0.294                   |
| Sex, age, sex*age, date                        | 5                         | 1062.6           | 8.50                      | 0.010                   |
| Sex, age, sex*age, species                     | 6                         | 1079.9           | 25.8                      | <0.001                  |
| Sex, age, sex*age                              | 4                         | 1084.2           | 30.1                      | <0.001                  |
| Constant                                       | 1                         | 1111.1           | 57                        | <0.001                  |

- a. n=2,086.
- b. Number of parameters in each model.
- c. Akaike's Information Criterion value.
- d. Difference in AIC value for each model relative to the lowest AIC for each species.  $\Delta$  AIC = 0 indicates the most parsimonious model for each species.
- e. Weight of evidence that a model represents the true best model considered.
